# Supplementary material for: Completion of the Chloroplast Genomes of Five Chinese Juglans and Their Contribution to Chloroplast Phylogeny
Source: Front Plant Sci. 2017 Jan 6;7:1955. doi: 10.3389/fpls.2016.01955 (PMC5216037; doi:10.3389/fpls.2016.01955)
Supplement: Table S4 — Simple sequence repeats in each of five Chinese Juglans species. [file Table4.XLSX]

## Sheet: Table S4
Table S4. Simple sequence repeats in each of five Chinese Juglans species.
Species	SSR type	Motif	SSR size (bp)	Start	End	Region	Annotation
J. cathayensis	p4	(TGAA)3	12	1554	1565	LSC	psbA-trnK
J. cathayensis	p1	(A)12	12	3725	3736	LSC	matk-trnk-UUU
J. cathayensis	p1	(T)12	12	4006	4017	LSC	matk-trnk-UUU
J. cathayensis	p1	(T)12	12	5293	5304	LSC	trnk-UUU Trna-rps16
J. cathayensis	p1	(T)10	10	6689	6698	LSC	rps16-trnQ-UUG
J. cathayensis	p1	(A)10	10	6931	6940	LSC	rps16-trnQ-UUG
J. cathayensis	p1	(T)11	11	7536	7546	LSC	rps16-trnQ-UUG
J. cathayensis	p1	(A)11	11	7870	7880	LSC	rps16-trnQ-UUG
J. cathayensis	p1	(A)10	10	8358	8367	LSC	trnQ-UUG-psbk
J. cathayensis	p5	(GATAA)3	15	8722	8736	LSC	psbk-psbl
J. cathayensis	p1	(A)10	10	9255	9264	LSC	psbl-trnS-GCU
J. cathayensis	p1	(A)10	10	9951	9960	LSC	trnS-GCU-trnR-UCU
J. cathayensis	p1	(A)10	10	10425	10434	LSC	trnS-GCU-trnR-UCU
J. cathayensis	p1	(A)10	10	11326	11335	LSC	trnS-GCU-trnR-UCU
J. cathayensis	p1	(T)11	11	13963	13973	LSC	trnS-GCU-trnR-UCU
J. cathayensis	p1	(T)12	12	18301	18312	LSC	trnS-GCU-trnR-UCU
J. cathayensis	p1	(T)11	11	20535	20545	LSC	trnS-GCU-trnR-UCU
J. cathayensis	p1	(T)11	11	21073	21083	LSC	trnS-GCU-trnR-UCU
J. cathayensis	p1	(T)12	12	23199	23210	LSC	trnS-GCU-trnR-UCU
J. cathayensis	p1	(A)10	10	24755	24764	LSC	trnS-GCU-trnR-UCU
J. cathayensis	p1	(T)10	10	25095	25104	LSC	trnS-GCU-trnR-UCU
J. cathayensis	p1	(T)10	10	28346	28355	LSC	trnS-GCU-trnR-UCU
J. cathayensis	p1	(A)10	10	30137	30146	LSC	trnS-GCU-trnR-UCU
J. cathayensis	p4	(AATA)3	12	33034	33045	LSC	trnS-GCU-trnR-UCU
J. cathayensis	p1	(A)12	12	33482	33493	LSC	trnS-GCU-trnR-UCU
J. cathayensis	p1	(T)10	10	34145	34154	LSC	trnS-GCU-trnR-UCU
J. cathayensis	p1	(A)11	11	34560	34570	LSC	trnS-GCU-trnR-UCU
J. cathayensis	p2	(AT)7	14	34936	34949	LSC	trnS-GCU-trnR-UCU
J. cathayensis	p2	(AT)6	12	36092	36103	LSC	trnS-GCU-trnR-UCU
J. cathayensis	p1	(A)10	10	40358	40367	LSC	trnS-GCU-trnR-UCU
J. cathayensis	p1	(A)12	12	40621	40632	LSC	trnS-GCU-trnR-UCU
J. cathayensis	p1	(A)10	10	48520	48529	LSC	trnS-GCU-trnR-UCU
J. cathayensis	p3	(ATT)5	15	48812	48826	LSC	trnS-GCU-trnR-UCU
J. cathayensis	p1	(A)10	10	49270	49279	LSC	trnS-GCU-trnR-UCU
J. cathayensis	p1	(A)10	10	51677	51686	LSC	trnS-GCU-trnR-UCU
J. cathayensis	p1	(A)10	10	54272	54281	LSC	trnS-GCU-trnR-UCU
J. cathayensis	p1	(T)10	10	54982	54991	LSC	trnS-GCU-trnR-UCU
J. cathayensis	p1	(T)10	10	56345	56354	LSC	trnS-GCU-trnR-UCU
J. cathayensis	p1	(T)12	12	56991	57002	LSC	trnS-GCU-trnR-UCU
J. cathayensis	p1	(T)10	10	58917	58926	LSC	trnS-GCU-trnR-UCU
J. cathayensis	p1	(A)10	10	61724	61733	LSC	trnS-GCU-trnR-UCU
J. cathayensis	p1	(A)12	12	63612	63623	LSC	trnS-GCU-trnR-UCU
J. cathayensis	p1	(T)15	15	64379	64393	LSC	trnS-GCU-trnR-UCU
J. cathayensis	p1	(T)12	12	65342	65353	LSC	trnS-GCU-trnR-UCU
J. cathayensis	p1	(T)10	10	67837	67846	LSC	trnS-GCU-trnR-UCU
J. cathayensis	p1	(T)11	11	71874	71884	LSC	trnS-GCU-trnR-UCU
J. cathayensis	p1	(T)11	11	75611	75621	LSC	trnS-GCU-trnR-UCU
J. cathayensis	p1	(G)10	10	77476	77485	LSC	trnS-GCU-trnR-UCU
J. cathayensis	p1	(T)13	13	82078	82090	LSC	trnS-GCU-trnR-UCU
J. cathayensis	p1	(T)12	12	82946	82957	LSC	trnS-GCU-trnR-UCU
J. cathayensis	p1	(T)10	10	84572	84581	LSC	trnS-GCU-trnR-UCU
J. cathayensis	p1	(T)10	10	85082	85091	LSC	trnS-GCU-trnR-UCU
J. cathayensis	p1	(T)10	10	87788	87797	LSC	trnS-GCU-trnR-UCU
J. cathayensis	p1	(T)10	10	89349	89358	IRa	trnS-GCU-trnR-UCU
J. cathayensis	p2	(TA)6	12	89974	89985	IRa	trnS-GCU-trnR-UCU
J. cathayensis	p4	(TAAA)3	12	115358	115369	SSC	trnS-GCU-trnR-UCU
J. cathayensis	p1	(T)12	12	118032	118043	SSC	trnS-GCU-trnR-UCU
J. cathayensis	p1	(A)10	10	118236	118245	SSC	trnS-GCU-trnR-UCU
J. cathayensis	p1	(A)15	15	125726	125740	SSC	trnS-GCU-trnR-UCU
J. cathayensis	p1	(T)10	10	128755	128764	SSC	trnS-GCU-trnR-UCU
J. cathayensis	p1	(T)11	11	129348	129358	SSC	trnS-GCU-trnR-UCU
J. cathayensis	p1	(T)10	10	130108	130117	SSC	trnS-GCU-trnR-UCU
J. cathayensis	p1	(T)12	12	130403	130414	SSC	trnS-GCU-trnR-UCU
J. cathayensis	p1	(T)12	12	131756	131767	SSC	trnS-GCU-trnR-UCU
J. cathayensis	p2	(AT)6	12	159078	159089	IRb	trnS-GCU-trnR-UCU
J. cathayensis	p1	(A)10	10	159706	159715	IRb	trnS-GCU-trnR-UCU
J. hopeiensis	p4	(TGAA)3	12	1549	1560	LSC	trnS-GCU-trnR-UCU
J. hopeiensis	p1	(A)10	10	3720	3729	LSC	trnS-GCU-trnR-UCU
J. hopeiensis	p1	(T)12	12	3999	4010	LSC	trnS-GCU-trnR-UCU
J. hopeiensis	p1	(A)10	10	4555	4564	LSC	trnS-GCU-trnR-UCU
J. hopeiensis	p1	(A)10	10	4782	4791	LSC	trnS-GCU-trnR-UCU
J. hopeiensis	c	(A)11gaaagttaaagtttcaacgaaaaccaaccattattgattgaattagcaataatataaaattttctatttatagatccaactacttcatttattcactttc(T)10	121	4971	5091	LSC	trnS-GCU-trnR-UCU
J. hopeiensis	c	(C)11(T)10	21	5277	5297	LSC	trnS-GCU-trnR-UCU
J. hopeiensis	p1	(T)10	10	6682	6691	LSC	trnS-GCU-trnR-UCU
J. hopeiensis	p1	(T)10	10	7528	7537	LSC	trnS-GCU-trnR-UCU
J. hopeiensis	p1	(A)12	12	7860	7871	LSC	trnS-GCU-trnR-UCU
J. hopeiensis	p1	(A)12	12	8349	8360	LSC	trnS-GCU-trnR-UCU
J. hopeiensis	p5	(GATAA)3	15	8715	8729	LSC	trnS-GCU-trnR-UCU
J. hopeiensis	p1	(A)10	10	9249	9258	LSC	trnS-GCU-trnR-UCU
J. hopeiensis	p1	(A)11	11	9945	9955	LSC	trnS-GCU-trnR-UCU
J. hopeiensis	p1	(A)11	11	10419	10429	LSC	trnS-GCU-trnR-UCU
J. hopeiensis	p1	(A)10	10	11321	11330	LSC	trnS-GCU-trnR-UCU
J. hopeiensis	c	(T)10g(A)11	22	13235	13256	LSC	trnS-GCU-trnR-UCU
J. hopeiensis	p1	(T)11	11	13959	13969	LSC	trnS-GCU-trnR-UCU
J. hopeiensis	p1	(A)10	10	14391	14400	LSC	trnS-GCU-trnR-UCU
J. hopeiensis	p1	(A)12	12	14792	14803	LSC	trnS-GCU-trnR-UCU
J. hopeiensis	p1	(T)11	11	15921	15931	LSC	trnS-GCU-trnR-UCU
J. hopeiensis	p1	(A)13	13	18309	18321	LSC	trnS-GCU-trnR-UCU
J. hopeiensis	p1	(T)11	11	18633	18643	LSC	trnS-GCU-trnR-UCU
J. hopeiensis	p1	(T)11	11	20537	20547	LSC	trnS-GCU-trnR-UCU
J. hopeiensis	p1	(T)11	11	21075	21085	LSC	trnS-GCU-trnR-UCU
J. hopeiensis	p1	(T)12	12	23201	23212	LSC	trnS-GCU-trnR-UCU
J. hopeiensis	c	(T)10ctttttttagattgagtttatattttttttctgaattctttattcaactataaattacgacataaaatt(A)11	90	24679	24768	LSC	trnS-GCU-trnR-UCU
J. hopeiensis	p1	(T)10	10	25099	25108	LSC	trnS-GCU-trnR-UCU
J. hopeiensis	p1	(T)10	10	28350	28359	LSC	trnS-GCU-trnR-UCU
J. hopeiensis	p1	(A)10	10	30141	30150	LSC	trnS-GCU-trnR-UCU
J. hopeiensis	p4	(AATA)3	12	33029	33040	LSC	trnS-GCU-trnR-UCU
J. hopeiensis	p1	(A)12	12	33477	33488	LSC	trnS-GCU-trnR-UCU
J. hopeiensis	p1	(T)10	10	34140	34149	LSC	trnS-GCU-trnR-UCU
J. hopeiensis	p1	(A)10	10	34576	34585	LSC	trnS-GCU-trnR-UCU
J. hopeiensis	p2	(AT)7	14	34951	34964	LSC	trnS-GCU-trnR-UCU
J. hopeiensis	c	(A)10gtaagtggacctaacttattgaataatgactatatccactattctgatattaaaattcgataaagatgaaattgtaacggtcagtagatc(T)12	112	35443	35554	LSC	trnS-GCU-trnR-UCU
J. hopeiensis	c	(AT)9ttattatatatatttttttttatata(AT)7	58	35803	35860	LSC	trnS-GCU-trnR-UCU
J. hopeiensis	p2	(AT)6	12	36093	36104	LSC	trnS-GCU-trnR-UCU
J. hopeiensis	p1	(A)10	10	39335	39344	LSC	trnS-GCU-trnR-UCU
J. hopeiensis	p1	(A)10	10	40360	40369	LSC	trnS-GCU-trnR-UCU
J. hopeiensis	p1	(A)10	10	40623	40632	LSC	trnS-GCU-trnR-UCU
J. hopeiensis	c	(A)10tcgattctctactctatctgtgttgtgtatcggttattcctacgaaataccggacgaaat(A)10	80	46367	46446	LSC	trnS-GCU-trnR-UCU
J. hopeiensis	p1	(A)10	10	48520	48529	LSC	trnS-GCU-trnR-UCU
J. hopeiensis	p3	(ATT)5	15	48812	48826	LSC	trnS-GCU-trnR-UCU
J. hopeiensis	p1	(A)10	10	49270	49279	LSC	trnS-GCU-trnR-UCU
J. hopeiensis	p1	(A)10	10	49816	49825	LSC	trnS-GCU-trnR-UCU
J. hopeiensis	p1	(A)10	10	51678	51687	LSC	trnS-GCU-trnR-UCU
J. hopeiensis	p1	(A)10	10	54264	54273	LSC	trnS-GCU-trnR-UCU
J. hopeiensis	p1	(T)10	10	56336	56345	LSC	trnS-GCU-trnR-UCU
J. hopeiensis	p1	(T)12	12	56982	56993	LSC	trnS-GCU-trnR-UCU
J. hopeiensis	p1	(T)10	10	58908	58917	LSC	trnS-GCU-trnR-UCU
J. hopeiensis	p1	(A)10	10	61715	61724	LSC	trnS-GCU-trnR-UCU
J. hopeiensis	c	(AT)6aat(A)10tcatttctc(T)10	44	63453	63496	LSC	trnS-GCU-trnR-UCU
J. hopeiensis	p1	(A)11	11	63603	63613	LSC	trnS-GCU-trnR-UCU
J. hopeiensis	p1	(T)14	14	64368	64381	LSC	trnS-GCU-trnR-UCU
J. hopeiensis	p1	(T)10	10	65330	65339	LSC	trnS-GCU-trnR-UCU
J. hopeiensis	p1	(T)11	11	71857	71867	LSC	trnS-GCU-trnR-UCU
J. hopeiensis	p1	(T)10	10	75593	75602	LSC	trnS-GCU-trnR-UCU
J. hopeiensis	p1	(G)10	10	77458	77467	LSC	trnS-GCU-trnR-UCU
J. hopeiensis	p1	(A)10	10	80225	80234	LSC	trnS-GCU-trnR-UCU
J. hopeiensis	p1	(A)10	10	80518	80527	LSC	trnS-GCU-trnR-UCU
J. hopeiensis	p1	(T)15	15	82062	82076	LSC	trnS-GCU-trnR-UCU
J. hopeiensis	p1	(T)11	11	82931	82941	LSC	trnS-GCU-trnR-UCU
J. hopeiensis	p1	(T)10	10	84556	84565	LSC	trnS-GCU-trnR-UCU
J. hopeiensis	p1	(T)10	10	85149	85158	LSC	trnS-GCU-trnR-UCU
J. hopeiensis	c	(A)11gaaatattgtttgtccaaaataaat(A)13gaaacctacaattg(T)10	73	86217	86289	LSC	trnS-GCU-trnR-UCU
J. hopeiensis	p1	(T)10	10	87771	87780	LSC	trnS-GCU-trnR-UCU
J. hopeiensis	p1	(T)10	10	89332	89341	IRa	trnS-GCU-trnR-UCU
J. hopeiensis	p2	(TA)6	12	89957	89968	IRa	trnS-GCU-trnR-UCU
J. hopeiensis	p4	(TAAA)3	12	115341	115352	SSC	trnS-GCU-trnR-UCU
J. hopeiensis	p1	(T)12	12	118015	118026	SSC	trnS-GCU-trnR-UCU
J. hopeiensis	p1	(A)10	10	118219	118228	SSC	trnS-GCU-trnR-UCU
J. hopeiensis	p1	(A)15	15	125709	125723	SSC	trnS-GCU-trnR-UCU
J. hopeiensis	c	(T)13aattgtattttttcta(T)11	40	125911	125950	SSC	trnS-GCU-trnR-UCU
J. hopeiensis	p2	(AT)6	12	126423	126434	SSC	trnS-GCU-trnR-UCU
J. hopeiensis	p1	(T)11	11	128738	128748	SSC	trnS-GCU-trnR-UCU
J. hopeiensis	p1	(T)11	11	129332	129342	SSC	trnS-GCU-trnR-UCU
J. hopeiensis	p1	(T)10	10	130092	130101	SSC	trnS-GCU-trnR-UCU
J. hopeiensis	p1	(T)12	12	130387	130398	SSC	trnS-GCU-trnR-UCU
J. hopeiensis	c	(T)11aatttaagaagaagctctgcaatgattctaaatagaataatgatacatagaaagatatatatgtatagtttttcaatcaaaaattt(A)10	107	131343	131449	SSC	trnS-GCU-trnR-UCU
J. hopeiensis	p1	(T)12	12	131740	131751	SSC	trnS-GCU-trnR-UCU
J. hopeiensis	p2	(AT)6	12	159062	159073	IRb	trnS-GCU-trnR-UCU
J. hopeiensis	p1	(A)10	10	159690	159699	IRb	trnS-GCU-trnR-UCU
J. mandshurica	p4	(TGAA)3	12	1549	1560	LSC	trnS-GCU-trnR-UCU
J. mandshurica	p1	(A)10	10	3720	3729	LSC	trnS-GCU-trnR-UCU
J. mandshurica	p1	(T)12	12	3999	4010	LSC	trnS-GCU-trnR-UCU
J. mandshurica	p1	(A)10	10	4555	4564	LSC	trnS-GCU-trnR-UCU
J. mandshurica	p1	(A)10	10	4782	4791	LSC	trnS-GCU-trnR-UCU
J. mandshurica	c	(A)11gaaagttaaagtttcaacgaaaaccaaccattattgattgaattagcaataatataaaattttctatttatagatccaactacttcatttattcactttc(T)10	121	4971	5091	LSC	trnS-GCU-trnR-UCU
J. mandshurica	c	(C)11(T)10	21	5277	5297	LSC	trnS-GCU-trnR-UCU
J. mandshurica	p1	(T)10	10	6682	6691	LSC	trnS-GCU-trnR-UCU
J. mandshurica	p1	(T)10	10	7528	7537	LSC	trnS-GCU-trnR-UCU
J. mandshurica	p1	(A)12	12	7860	7871	LSC	trnS-GCU-trnR-UCU
J. mandshurica	p1	(A)12	12	8349	8360	LSC	trnS-GCU-trnR-UCU
J. mandshurica	p5	(GATAA)3	15	8715	8729	LSC	trnS-GCU-trnR-UCU
J. mandshurica	p1	(A)10	10	9249	9258	LSC	trnS-GCU-trnR-UCU
J. mandshurica	p1	(A)11	11	9945	9955	LSC	trnS-GCU-trnR-UCU
J. mandshurica	p1	(A)11	11	10419	10429	LSC	trnS-GCU-trnR-UCU
J. mandshurica	p1	(A)10	10	11321	11330	LSC	trnS-GCU-trnR-UCU
J. mandshurica	c	(T)10g(A)11	22	13235	13256	LSC	trnS-GCU-trnR-UCU
J. mandshurica	p1	(T)11	11	13959	13969	LSC	trnS-GCU-trnR-UCU
J. mandshurica	p1	(A)10	10	14391	14400	LSC	trnS-GCU-trnR-UCU
J. mandshurica	p1	(A)12	12	14792	14803	LSC	trnS-GCU-trnR-UCU
J. mandshurica	p1	(T)11	11	15921	15931	LSC	trnS-GCU-trnR-UCU
J. mandshurica	p1	(A)13	13	18309	18321	LSC	trnS-GCU-trnR-UCU
J. mandshurica	p1	(T)11	11	18633	18643	LSC	trnS-GCU-trnR-UCU
J. mandshurica	p1	(T)11	11	20537	20547	LSC	trnS-GCU-trnR-UCU
J. mandshurica	p1	(T)11	11	21075	21085	LSC	trnS-GCU-trnR-UCU
J. mandshurica	p1	(T)12	12	23201	23212	LSC	trnS-GCU-trnR-UCU
J. mandshurica	c	(T)10ctttttttagattgagtttatattttttttctgaattctttattcaactataaattacgacataaaatt(A)11	90	24679	24768	LSC	trnS-GCU-trnR-UCU
J. mandshurica	p1	(T)10	10	25099	25108	LSC	trnS-GCU-trnR-UCU
J. mandshurica	p1	(T)10	10	28350	28359	LSC	trnS-GCU-trnR-UCU
J. mandshurica	p1	(A)10	10	30141	30150	LSC	trnS-GCU-trnR-UCU
J. mandshurica	p4	(AATA)3	12	33029	33040	LSC	trnS-GCU-trnR-UCU
J. mandshurica	p1	(A)12	12	33477	33488	LSC	trnS-GCU-trnR-UCU
J. mandshurica	p1	(T)10	10	34140	34149	LSC	trnS-GCU-trnR-UCU
J. mandshurica	p1	(A)10	10	34577	34586	LSC	trnS-GCU-trnR-UCU
J. mandshurica	p2	(AT)7	14	34952	34965	LSC	trnS-GCU-trnR-UCU
J. mandshurica	c	(A)10gtaagtggacctaacttattgaataatgactatatccactattctgatattaaaattcgataaagatgaaattgtaacggtcagtagatc(T)12	112	35444	35555	LSC	trnS-GCU-trnR-UCU
J. mandshurica	c	(AT)6ttattatatatatttttttttatata(AT)7	52	35824	35875	LSC	trnS-GCU-trnR-UCU
J. mandshurica	p2	(AT)6	12	36108	36119	LSC	trnS-GCU-trnR-UCU
J. mandshurica	p1	(A)10	10	39350	39359	LSC	trnS-GCU-trnR-UCU
J. mandshurica	p1	(A)10	10	40375	40384	LSC	trnS-GCU-trnR-UCU
J. mandshurica	p1	(A)10	10	40638	40647	LSC	trnS-GCU-trnR-UCU
J. mandshurica	c	(A)10tcgattctctactctatctgtgttgtgtatcggttattcctacgaaataccggacgaaat(A)10	80	46382	46461	LSC	trnS-GCU-trnR-UCU
J. mandshurica	p1	(A)10	10	48535	48544	LSC	trnS-GCU-trnR-UCU
J. mandshurica	p3	(ATT)5	15	48827	48841	LSC	trnS-GCU-trnR-UCU
J. mandshurica	p1	(A)10	10	49285	49294	LSC	trnS-GCU-trnR-UCU
J. mandshurica	p1	(A)10	10	49831	49840	LSC	trnS-GCU-trnR-UCU
J. mandshurica	p1	(A)10	10	51693	51702	LSC	trnS-GCU-trnR-UCU
J. mandshurica	p1	(A)10	10	54279	54288	LSC	trnS-GCU-trnR-UCU
J. mandshurica	p1	(T)10	10	56351	56360	LSC	trnS-GCU-trnR-UCU
J. mandshurica	p1	(T)12	12	56997	57008	LSC	trnS-GCU-trnR-UCU
J. mandshurica	p1	(T)10	10	58923	58932	LSC	trnS-GCU-trnR-UCU
J. mandshurica	p1	(A)10	10	61730	61739	LSC	trnS-GCU-trnR-UCU
J. mandshurica	c	(AT)6aat(A)10tcatttctc(T)10	44	63468	63511	LSC	trnS-GCU-trnR-UCU
J. mandshurica	p1	(A)11	11	63618	63628	LSC	trnS-GCU-trnR-UCU
J. mandshurica	p1	(T)14	14	64383	64396	LSC	trnS-GCU-trnR-UCU
J. mandshurica	p1	(T)10	10	65345	65354	LSC	trnS-GCU-trnR-UCU
J. mandshurica	p1	(T)11	11	71872	71882	LSC	trnS-GCU-trnR-UCU
J. mandshurica	p1	(T)10	10	75608	75617	LSC	trnS-GCU-trnR-UCU
J. mandshurica	p1	(G)10	10	77473	77482	LSC	trnS-GCU-trnR-UCU
J. mandshurica	p1	(A)10	10	80240	80249	LSC	trnS-GCU-trnR-UCU
J. mandshurica	p1	(A)10	10	80533	80542	LSC	trnS-GCU-trnR-UCU
J. mandshurica	p1	(T)15	15	82077	82091	LSC	trnS-GCU-trnR-UCU
J. mandshurica	p1	(T)11	11	82946	82956	LSC	trnS-GCU-trnR-UCU
J. mandshurica	p1	(T)10	10	84571	84580	LSC	trnS-GCU-trnR-UCU
J. mandshurica	p1	(T)10	10	85164	85173	LSC	trnS-GCU-trnR-UCU
J. mandshurica	c	(A)11gaaatattgtttgtccaaaataaat(A)13gaaacctacaattg(T)10	73	86232	86304	LSC	trnS-GCU-trnR-UCU
J. mandshurica	p1	(T)10	10	87786	87795	LSC	trnS-GCU-trnR-UCU
J. mandshurica	p1	(T)10	10	89347	89356	IRa	trnS-GCU-trnR-UCU
J. mandshurica	p2	(TA)6	12	89972	89983	IRa	trnS-GCU-trnR-UCU
J. mandshurica	p4	(TAAA)3	12	115356	115367	SSC	trnS-GCU-trnR-UCU
J. mandshurica	p1	(T)12	12	118030	118041	SSC	trnS-GCU-trnR-UCU
J. mandshurica	p1	(A)10	10	118234	118243	SSC	trnS-GCU-trnR-UCU
J. mandshurica	p1	(A)15	15	125724	125738	SSC	trnS-GCU-trnR-UCU
J. mandshurica	c	(T)13aattgtattttttcta(T)11	40	125926	125965	SSC	trnS-GCU-trnR-UCU
J. mandshurica	p2	(AT)6	12	126438	126449	SSC	trnS-GCU-trnR-UCU
J. mandshurica	p1	(T)11	11	128753	128763	SSC	trnS-GCU-trnR-UCU
J. mandshurica	p1	(T)11	11	129347	129357	SSC	trnS-GCU-trnR-UCU
J. mandshurica	p1	(T)10	10	130107	130116	SSC	trnS-GCU-trnR-UCU
J. mandshurica	p1	(T)12	12	130402	130413	SSC	trnS-GCU-trnR-UCU
J. mandshurica	c	(T)11aatttaagaagaagctctgcaatgattctaaatagaataatgatacatagaaagatatatatgtatagtttttcaatcaaaaattt(A)10	107	131358	131464	SSC	trnS-GCU-trnR-UCU
J. mandshurica	p1	(T)12	12	131755	131766	SSC	trnS-GCU-trnR-UCU
J. mandshurica	p2	(AT)6	12	159077	159088	IRb	trnS-GCU-trnR-UCU
J. mandshurica	p1	(A)10	10	159705	159714	IRb	trnS-GCU-trnR-UCU
J. regia	p4	(TGAA)3	12	1561	1572	LSC	psbA-trnK
J. regia	p1	(A)10	10	3733	3742	LSC	matk-trnk-UUU
J. regia	p1	(T)10	10	4012	4021	LSC	matk-trnk-UUU
J. regia	p1	(A)12	12	4567	4578	LSC	trnk-UUU-rps16
J. regia	p1	(A)13	13	4984	4996	LSC	trnk-UUU-rps16
J. regia	p1	(T)11	11	6675	6685	LSC	rps16-trnQ-UUG
J. regia	p1	(T)11	11	7543	7553	LSC	rps16-trnQ-UUG
J. regia	p1	(A)13	13	7863	7875	LSC	rps16-trnQ-UUG
J. regia	p1	(T)10	10	9025	9034	LSC	psbk-psbl
J. regia	c	(A)10gactcgtctaaattgaaagataaat(A)10	45	9259	9303	LSC	psbl-trnS-GCU
J. regia	p1	(A)11	11	9967	9977	LSC	trnG-GCC (intron)
J. regia	c*	(ATT)5(T)10*c(A)11	35	13255	13289	LSC	trnG-GCC -trnR-UCU
J. regia	p1	(T)10	10	13986	13995	LSC	atpF intron
J. regia	p1	(A)10	10	14817	14826	LSC	atpF-atpH
J. regia	p1	(T)10	10	15613	15622	LSC	atpH-atpI
J. regia	p1	(T)12	12	15970	15981	LSC	atpH-atpI
J. regia	p1	(A)10	10	17387	17396	LSC	atpI-rps2
J. regia	p1	(A)12	12	18330	18341	LSC	rps2-rpoC2
J. regia	p1	(T)10	10	18653	18662	LSC	rpoC2
J. regia	p1	(T)11	11	20571	20581	LSC	rpoC2
J. regia	p1	(T)11	11	21109	21119	LSC	rpoC2
J. regia	p1	(T)12	12	23235	23246	LSC	rpoC1
J. regia	p5	(ATAAA)3	15	24783	24797	LSC	rpoC1 (intron)
J. regia	p1	(T)15	15	25130	25144	LSC	rpoC1 (intron)
J. regia	p1	(T)10	10	28386	28395	LSC	rpoB
J. regia	p1	(A)10	10	30177	30186	LSC	rpoB-trnC-GCA
J. regia	p1	(T)11	11	31420	31430	LSC	petN-psbM
J. regia	c	(AATA)3gaaact(AATA)3	30	33480	33509	LSC	psbM-trnD-GUC
J. regia	p1	(A)10	10	35032	35041	LSC	trnE-UUC - trnM-CAU /trnT-GGU
J. regia	p2	(AT)7	14	35413	35426	LSC	trnE-UUC - trnM-CAU /trnT-GGU
J. regia	p1	(T)11	11	36004	36014	LSC	trnM-CAU /trnT-GGU-psbD
J. regia	c	(TTTATA)3tataaatag(AT)7ttat(TA)6	57	36234	36290	LSC	trnM-CAU /trnT-GGU-psbD
J. regia	p2	(AT)6	12	36543	36554	LSC	trnM-CAU /trnT-GGU-psbD
J. regia	p1	(A)10	10	40802	40811	LSC	IhbA-trnG-UUC
J. regia	p1	(A)11	11	41095	41105	LSC	trnG-UUC -trnfM-CAU
J. regia	c	(A)10tcgattctctactctatctgtgttgtgtatcggttattcctacgaaataccggacgaaat(A)11	81	46840	46920	LSC	psaA-ycf3
J. regia	p3	(ATT)5	15	49284	49298	LSC	ycf3 -trnS-GGA
J. regia	p3	(ATA)4	12	54022	54033	LSC	trnF-ndhJ
J. regia	p1	(A)10	10	54739	54748	LSC	ndhJ-ndhK
J. regia	p1	(T)10	10	55449	55458	LSC	ndhK-ndhC
J. regia	p1	(T)10	10	56801	56810	LSC	trnV-UAC ( intron)
J. regia	p1	(T)12	12	57447	57458	LSC	trnM-CAU /trnT-GGU-atpE
J. regia	p1	(T)10	10	59399	59408	LSC	atpB
J. regia	p1	(A)10	10	62206	62215	LSC	rbcL-accD
J. regia	p2	(AT)6	12	63935	63946	LSC	accD-psaI
J. regia	p1	(A)10	10	64083	64092	LSC	accD-psaI
J. regia	p1	(T)11	11	64834	64844	LSC	psaI-ycf4
J. regia	p1	(T)14	14	65793	65806	LSC	ycf4-cemA
J. regia	p1	(A)13	13	71248	71260	LSC	psbE-peiL
J. regia	p1	(T)10	10	76094	76103	LSC	clpP( intron)
J. regia	p1	(T)10	10	76239	76248	LSC	clpP( intron)
J. regia	p1	(A)11	11	81083	81093	LSC	petB (intron)
J. regia	p1	(T)10	10	82628	82637	LSC	petD( intron)
J. regia	p1	(T)10	10	83493	83502	LSC	petD-rpoA
J. regia	p1	(T)13	13	85117	85129	LSC	rps11-rpl36
J. regia	c	(A)10gaaatattgtttgtccaaaataaat(A)10	45	86778	86822	LSC	rpl14-rpl16
J. regia	p1	(T)10	10	88327	88336	LSC	rpl16-rps3
J. regia	p2	(TA)6	12	90512	90523	IRa	rpl2( intron)
J. regia	p1	(A)11	11	118400	118410	SSC	ndhF-rpl32
J. regia	c	(C)10(A)10gagtta(T)13	39	118555	118593	SSC	ndhF-rpl32
J. regia	p1	(A)15	15	126298	126312	SSC	ndhA( intron)
J. regia	c	(A)14gatctc(T)10aattgtattttttcta(T)11	57	126539	126595	SSC	ndhA( intron)
J. regia	p1	(T)11	11	129974	129984	SSC	ycf1
J. regia	p1	(T)10	10	130734	130743	SSC	ycf1
J. regia	p1	(T)12	12	131029	131040	SSC	ycf1
J. regia	p1	(A)10	10	132082	132091	SSC	ycf1
J. regia	p2	(AT)6	12	159716	159727	IRb	rpl2( intron)
J. sigillata	p4	(TGAA)3	12	1561	1572	LSC	psbA-trnK
J. sigillata	p1	(A)10	10	3733	3742	LSC	matk-trnk-UUU
J. sigillata	p1	(T)10	10	4012	4021	LSC	matk-trnk-UUU
J. sigillata	p1	(A)12	12	4567	4578	LSC	trnk-UUU-rps16
J. sigillata	p1	(A)13	13	4984	4996	LSC	trnk-UUU-rps16
J. sigillata	p1	(T)11	11	6675	6685	LSC	rps16-trnQ-UUG
J. sigillata	p1	(T)11	11	7543	7553	LSC	rps16-trnQ-UUG
J. sigillata	p1	(A)13	13	7863	7875	LSC	rps16-trnQ-UUG
J. sigillata	c	(A)10gactcgtctaaattgaaagataaat(A)10	45	9258	9302	LSC	psbl-trnS-GCU
J. sigillata	p1	(A)11	11	9966	9976	LSC	trnG-GCC (intron)
J. sigillata	c*	(ATT)5(T)10*c(A)11	35	13254	13288	LSC	trnG-GCC -trnR-UCU
J. sigillata	p1	(T)10	10	13985	13994	LSC	atpF intron
J. sigillata	p1	(A)10	10	14816	14825	LSC	atpF-atpH
J. sigillata	p1	(T)10	10	15612	15621	LSC	atpH-atpI
J. sigillata	p1	(T)12	12	15969	15980	LSC	atpH-atpI
J. sigillata	p1	(A)10	10	17386	17395	LSC	atpI-rps2
J. sigillata	p1	(A)12	12	18329	18340	LSC	rps2-rpoC2
J. sigillata	p1	(T)10	10	18652	18661	LSC	rpoC2
J. sigillata	p1	(T)11	11	20570	20580	LSC	rpoC2
J. sigillata	p1	(T)11	11	21108	21118	LSC	rpoC2
J. sigillata	p1	(T)12	12	23234	23245	LSC	rpoC1
J. sigillata	p5	(ATAAA)3	15	24782	24796	LSC	rpoC1 (intron)
J. sigillata	p1	(T)15	15	25129	25143	LSC	rpoC1 (intron)
J. sigillata	p1	(T)10	10	28385	28394	LSC	rpoB
J. sigillata	p1	(A)10	10	30176	30185	LSC	rpoB-trnC-GCA
J. sigillata	p1	(T)11	11	31419	31429	LSC	petN-psbM
J. sigillata	c	(AATA)3gaaact(AATA)3	30	33479	33508	LSC	psbM-trnD-GUC
J. sigillata	p1	(A)11	11	35031	35041	LSC	trnE-UUC - trnM-CAU /trnT-GGU
J. sigillata	p2	(AT)7	14	35413	35426	LSC	trnE-UUC - trnM-CAU /trnT-GGU
J. sigillata	p1	(T)11	11	36005	36015	LSC	trnM-CAU /trnT-GGU-psbD
J. sigillata	c	(TTTATA)3tataaatag(AT)7ttat(TA)6	57	36235	36291	LSC	trnM-CAU /trnT-GGU-psbD
J. sigillata	p2	(AT)6	12	36544	36555	LSC	trnM-CAU /trnT-GGU-psbD
J. sigillata	p1	(A)10	10	40803	40812	LSC	IhbA-trnG-UUC
J. sigillata	p1	(A)11	11	41096	41106	LSC	trnG-UUC -trnfM-CAU
J. sigillata	c	(A)10tcgattctctactctatctgtgttgtgtatcggttattcctacgaaataccggacgaaat(A)11	81	46841	46921	LSC	psaA-ycf3
J. sigillata	p3	(ATT)5	15	49285	49299	LSC	ycf3 -trnS-GGA
J. sigillata	p3	(ATA)4	12	54023	54034	LSC	trnF-ndhJ
J. sigillata	p1	(A)10	10	54740	54749	LSC	ndhJ-ndhK
J. sigillata	p1	(T)10	10	55450	55459	LSC	ndhK-ndhC
J. sigillata	p1	(T)10	10	56802	56811	LSC	trnV-UAC ( intron)
J. sigillata	p1	(T)12	12	57448	57459	LSC	trnM-CAU /trnT-GGU-atpE
J. sigillata	p1	(T)10	10	59400	59409	LSC	atpB
J. sigillata	p1	(A)10	10	62207	62216	LSC	rbcL-accD
J. sigillata	p2	(AT)6	12	63936	63947	LSC	accD-psaI
J. sigillata	p1	(A)10	10	64084	64093	LSC	accD-psaI
J. sigillata	p1	(T)10	10	64835	64844	LSC	psaI-ycf4
J. sigillata	p1	(T)14	14	65793	65806	LSC	ycf4-cemA
J. sigillata	p1	(A)13	13	71248	71260	LSC	psbE-peiL
J. sigillata	p1	(T)10	10	76094	76103	LSC	clpP( intron)
J. sigillata	p1	(T)10	10	76239	76248	LSC	clpP( intron)
J. sigillata	p1	(A)11	11	81083	81093	LSC	petB (intron)
J. sigillata	p1	(T)10	10	82628	82637	LSC	petD( intron)
J. sigillata	p1	(T)10	10	83493	83502	LSC	petD-rpoA
J. sigillata	p1	(T)13	13	85117	85129	LSC	rps11-rpl36
J. sigillata	c	(A)10gaaatattgtttgtccaaaataaat(A)10	45	86778	86822	LSC	rpl14-rpl16
J. sigillata	p1	(T)10	10	88327	88336	LSC	rpl16-rps3
J. sigillata	p2	(TA)6	12	90512	90523	IRa	rpl2( intron)
J. sigillata	p1	(A)12	12	118400	118411	SSC	ndhF-rpl32
J. sigillata	c	(C)10aaaaaaaaagagtta(T)13	38	118556	118593	SSC	ndhF-rpl32
J. sigillata	p1	(A)15	15	126281	126295	SSC	ndhA( intron)
J. sigillata	c	(A)14gatctc(T)10aattgtattttttcta(T)11	57	126522	126578	SSC	ndhA( intron)
J. sigillata	p1	(T)11	11	129957	129967	SSC	ycf1
J. sigillata	p1	(T)10	10	130717	130726	SSC	ycf1
J. sigillata	p1	(T)12	12	131012	131023	SSC	ycf1
J. sigillata	p1	(A)10	10	132065	132074	SSC	ycf1
J. sigillata	p2	(AT)6	12	159699	159710	IRb	rpl2( intron)
			5960
